# Supplementary material for: In situ U–Pb dating of bastnaesite by LA-ICP-MS
Source: Royal Society of Chemistry journal article supplement (doi:10.1039/c4ja00001c), 2014-01-01
Supplement: c4ja00001c1.pdf [file c4ja00001c1.pdf]

**Appendix 1 data of REE concentration (ppm) of bastnaesite in this study.**

| <b>Name</b> | <b>K-9</b> | <b>MNP4256</b> | <b>DLS118</b> | <b>DLS110</b> | <b>ZJLZ-103</b> | <b>LZ122</b> | <b>DLC43</b> |
|-------------|------------|----------------|---------------|---------------|-----------------|--------------|--------------|
| <b>La</b>   | 109644     | 139359         | 129400        | 144868        | 181584          | 141551       | 185257       |
| <b>Ce</b>   | 154026     | 148164         | 152397        | 152397        | 148571          | 148571       | 152397       |
| <b>Pr</b>   | 16134      | 12212          | 12866         | 12991         | 11254           | 13131        | 10296        |
| <b>Nd</b>   | 54020      | 35350          | 37544         | 39722         | 30968           | 32799        | 27177        |
| <b>Sm</b>   | 5372       | 2286           | 3019          | 3154          | 1512            | 2158         | 1314         |
| <b>Eu</b>   | 1102       | 338            | 492           | 503           | 197             | 327          | 193          |
| <b>Gd</b>   | 2073       | 691            | 1053          | 1245          | 527             | 607          | 538          |
| <b>Tb</b>   | 142        | 32             | 57            | 62            | 19              | 28           | 19           |
| <b>Dy</b>   | 428        | 72             | 141           | 147           | 35              | 65           | 38           |
| <b>Ho</b>   | 48         | 6.6            | 14            | 14            | 3.1             | 6.3          | 3.6          |
| <b>Er</b>   | 67         | 9.7            | 19            | 23            | 7.6             | 9.8          | 8.4          |
| <b>Tm</b>   | 4.0        | 0.4            | 0.91          | 0.90          | 0.19            | 0.50         | 0.23         |
| <b>Yb</b>   | 12         | 1.2            | 2.67          | 2.91          | 0.66            | 1.83         | 0.80         |
| <b>Lu</b>   | 0.82       | 0.08           | 0.16          | 0.16          | 0.04            | 0.15         | 0.04         |

Appendix 2 data bastnaesite raw data of MD belt REE deposits, Sichuan SW China.

|                   | ppm        |             |           | Th/U       | <sup>238</sup> U/ <sup>206</sup> Pb | 1σ | <sup>207</sup> Pb/ <sup>206</sup> Pb | 1σ    | <sup>207</sup> Pb/ <sup>235</sup> U | 1σ    | <sup>206</sup> Pb/ <sup>238</sup> U | 1σ     | <sup>208</sup> Pb/ <sup>232</sup> Th | 1σ      | (Ma)                    | (Ma)  |
|-------------------|------------|-------------|-----------|------------|-------------------------------------|----|--------------------------------------|-------|-------------------------------------|-------|-------------------------------------|--------|--------------------------------------|---------|-------------------------|-------|
|                   | Pb         | Th          | U         |            |                                     |    |                                      |       |                                     |       |                                     |        |                                      |         | <sup>207</sup> Pb Corr. | Error |
| <b>MNP4256 01</b> | 4.6        | 1868        | 10        | 183        | 112                                 | 9  | 0.398                                | 0.063 | 0.492                               | 0.069 | 0.0090                              | 0.0007 | 0.00138                              | 0.00002 | 32                      | 5     |
| <b>MNP4256 02</b> | 4.7        | 1912        | 11        | 179        | 129                                 | 10 | 0.397                                | 0.065 | 0.425                               | 0.062 | 0.0078                              | 0.0006 | 0.00137                              | 0.00002 | 28                      | 5     |
| <b>MNP4256 03</b> | 4.8        | 1947        | 11        | 180        | 120                                 | 10 | 0.357                                | 0.069 | 0.409                               | 0.072 | 0.0083                              | 0.0007 | 0.00136                              | 0.00002 | 32                      | 6     |
| <b>MNP4256 04</b> | 4.6        | 1869        | 10        | 178        | 133                                 | 11 | 0.349                                | 0.070 | 0.362                               | 0.066 | 0.0075                              | 0.0006 | 0.00137                              | 0.00002 | 30                      | 5     |
| <b>MNP4256 05</b> | 7.1        | 2992        | 6.5       | 461        | 84                                  | 8  | 0.562                                | 0.083 | 0.918                               | 0.110 | 0.0119                              | 0.0011 | 0.00133                              | 0.00002 | 27                      | 9     |
| <b>MNP4256 06</b> | 7.8        | 3286        | 7.9       | 418        | 99                                  | 9  | 0.502                                | 0.076 | 0.697                               | 0.087 | 0.0101                              | 0.0009 | 0.00136                              | 0.00002 | 27                      | 7     |
| <b>MNP4256 07</b> | 8.7        | 3681        | 11        | 325        | 136                                 | 11 | 0.313                                | 0.061 | 0.318                               | 0.057 | 0.0074                              | 0.0006 | 0.00133                              | 0.00002 | 31                      | 5     |
| <b>MNP4256 08</b> | 5.4        | 2261        | 12        | 192        | 129                                 | 11 | 0.343                                | 0.073 | 0.368                               | 0.073 | 0.0078                              | 0.0007 | 0.00137                              | 0.00002 | 31                      | 5     |
| <b>MNP4256 09</b> | 5.5        | 2285        | 12        | 193        | 118                                 | 9  | 0.459                                | 0.062 | 0.535                               | 0.062 | 0.0085                              | 0.0006 | 0.00139                              | 0.00002 | 26                      | 5     |
| <b>MNP4256 10</b> | 5.5        | 2253        | 11        | 205        | 140                                 | 13 | 0.323                                | 0.081 | 0.319                               | 0.075 | 0.0072                              | 0.0007 | 0.00137                              | 0.00002 | 30                      | 6     |
| <b>MNP4256 11</b> | 6.3        | 2611        | 13        | 199        | 122                                 | 9  | 0.296                                | 0.055 | 0.335                               | 0.058 | 0.0082                              | 0.0006 | 0.00138                              | 0.00002 | 36                      | 5     |
| <b>MNP4256 12</b> | 6.4        | 2636        | 13        | 203        | 125                                 | 9  | 0.340                                | 0.060 | 0.375                               | 0.061 | 0.0080                              | 0.0006 | 0.00138                              | 0.00002 | 32                      | 5     |
| <b>mean</b>       | <b>5.9</b> | <b>2467</b> | <b>11</b> | <b>243</b> |                                     |    |                                      |       |                                     |       |                                     |        |                                      |         |                         |       |
| <b>DLS118 01</b>  | 5.4        | 2097        | 13        | 157        | 144                                 | 11 | 0.239                                | 0.059 | 0.228                               | 0.054 | 0.0070                              | 0.0005 | 0.00140                              | 0.00003 | 34                      | 4     |
| <b>DLS118 02</b>  | 5.4        | 2149        | 14        | 151        | 136                                 | 9  | 0.259                                | 0.052 | 0.261                               | 0.049 | 0.0074                              | 0.0005 | 0.00140                              | 0.00003 | 35                      | 4     |
| <b>DLS118 03</b>  | 5.2        | 2149        | 14        | 150        | 161                                 | 12 | 0.164                                | 0.059 | 0.141                               | 0.049 | 0.0062                              | 0.0005 | 0.00133                              | 0.00003 | 34                      | 4     |
| <b>DLS118 04</b>  | 5.9        | 2374        | 18        | 135        | 156                                 | 11 | 0.238                                | 0.051 | 0.209                               | 0.043 | 0.0064                              | 0.0004 | 0.00139                              | 0.00003 | 31                      | 3     |
| <b>DLS118 05</b>  | 5.5        | 2244        | 15        | 153        | 144                                 | 12 | 0.317                                | 0.064 | 0.302                               | 0.055 | 0.0069                              | 0.0006 | 0.00136                              | 0.00003 | 29                      | 4     |
| <b>DLS118 06</b>  | 6.0        | 2300        | 14        | 164        | 153                                 | 12 | 0.228                                | 0.066 | 0.205                               | 0.057 | 0.0065                              | 0.0005 | 0.00149                              | 0.00003 | 32                      | 4     |
| <b>DLS118 07</b>  | 5.2        | 2016        | 13        | 153        | 156                                 | 12 | 0.255                                | 0.056 | 0.225                               | 0.046 | 0.0064                              | 0.0005 | 0.00142                              | 0.00003 | 30                      | 4     |
| <b>DLS118 08</b>  | 5.7        | 2282        | 15        | 148        | 151                                 | 12 | 0.228                                | 0.054 | 0.208                               | 0.047 | 0.0066                              | 0.0005 | 0.00138                              | 0.00003 | 33                      | 4     |
| <b>DLS118 09</b>  | 5.4        | 2143        | 16        | 136        | 122                                 | 8  | 0.377                                | 0.048 | 0.425                               | 0.048 | 0.0082                              | 0.0005 | 0.00141                              | 0.00003 | 31                      | 4     |
| <b>DLS118 10</b>  | 5.5        | 2076        | 18        | 115        | 95                                  | 6  | 0.482                                | 0.059 | 0.699                               | 0.074 | 0.0105                              | 0.0007 | 0.00153                              | 0.00003 | 30                      | 6     |
| <b>DLS118 11</b>  | 6.3        | 2458        | 16        | 157        | 142                                 | 10 | 0.272                                | 0.061 | 0.265                               | 0.056 | 0.0071                              | 0.0005 | 0.00145                              | 0.00003 | 32                      | 4     |
| <b>DLS118 12</b>  | 6.3        | 2378        | 16        | 147        | 117                                 | 8  | 0.366                                | 0.052 | 0.432                               | 0.055 | 0.0086                              | 0.0006 | 0.00145                              | 0.00003 | 33                      | 4     |
| <b>DLS118 13</b>  | 6.5        | 2567        | 16        | 163        | 161                                 | 12 | 0.201                                | 0.059 | 0.172                               | 0.049 | 0.0062                              | 0.0005 | 0.00143                              | 0.00003 | 32                      | 4     |

|                   |            |             |           |            |     |    |       |       |       |       |        |        |         |         |    |    |
|-------------------|------------|-------------|-----------|------------|-----|----|-------|-------|-------|-------|--------|--------|---------|---------|----|----|
| <b>DLS118 14</b>  | 6.7        | 2439        | 18        | 134        | 95  | 6  | 0.502 | 0.055 | 0.730 | 0.068 | 0.0106 | 0.0007 | 0.00147 | 0.00003 | 29 | 6  |
| <b>DLS118 15</b>  | 4.4        | 1622        | 17        | 93         | 112 | 7  | 0.445 | 0.052 | 0.546 | 0.055 | 0.0089 | 0.0005 | 0.00150 | 0.00003 | 28 | 4  |
| <b>mean</b>       | <b>5.7</b> | <b>2220</b> | <b>16</b> | <b>144</b> |     |    |       |       |       |       |        |        |         |         |    |    |
| <b>DLS110 01</b>  | 3.3        | 1667        | 11        | 151        | 124 | 17 | 0.307 | 0.066 | 0.340 | 0.057 | 0.0081 | 0.0011 | 0.00131 | 0.00004 | 35 | 7  |
| <b>DLS110 02</b>  | 3.6        | 1761        | 11        | 166        | 126 | 13 | 0.310 | 0.055 | 0.340 | 0.050 | 0.0080 | 0.0008 | 0.00142 | 0.00003 | 34 | 5  |
| <b>DLS110 03</b>  | 2.8        | 1331        | 12        | 113        | 154 | 27 | 0.236 | 0.064 | 0.211 | 0.044 | 0.0065 | 0.0011 | 0.00140 | 0.00005 | 32 | 6  |
| <b>DLS110 04</b>  | 4.1        | 1638        | 12        | 134        | 88  | 8  | 0.473 | 0.051 | 0.741 | 0.050 | 0.0114 | 0.0010 | 0.00154 | 0.00004 | 34 | 6  |
| <b>DLS110 05</b>  | 3.9        | 1803        | 12        | 155        | 160 | 17 | 0.232 | 0.045 | 0.199 | 0.032 | 0.0063 | 0.0007 | 0.00154 | 0.00003 | 31 | 4  |
| <b>DLS110 06</b>  | 4.0        | 1939        | 12        | 161        | 150 | 14 | 0.243 | 0.041 | 0.222 | 0.032 | 0.0067 | 0.0006 | 0.00137 | 0.00002 | 32 | 4  |
| <b>DLS110 07</b>  | 3.8        | 1685        | 11        | 151        | 120 | 10 | 0.321 | 0.041 | 0.369 | 0.037 | 0.0084 | 0.0007 | 0.00149 | 0.00003 | 35 | 4  |
| <b>DLS110 08</b>  | 4.2        | 1899        | 13        | 146        | 80  | 10 | 0.541 | 0.089 | 0.926 | 0.096 | 0.0124 | 0.0016 | 0.00151 | 0.00005 | 30 | 10 |
| <b>DLS110 09</b>  | 2.6        | 1247        | 12        | 104        | 126 | 18 | 0.316 | 0.066 | 0.344 | 0.053 | 0.0079 | 0.0012 | 0.00130 | 0.00005 | 34 | 7  |
| <b>DLS110 10</b>  | 3.3        | 1631        | 12        | 132        | 143 | 13 | 0.256 | 0.046 | 0.246 | 0.039 | 0.0070 | 0.0006 | 0.00140 | 0.00003 | 33 | 4  |
| <b>DLS110 11</b>  | 3.9        | 1925        | 12        | 157        | 115 | 10 | 0.351 | 0.047 | 0.419 | 0.044 | 0.0087 | 0.0008 | 0.00139 | 0.00003 | 34 | 5  |
| <b>DLS110 12</b>  | 4.3        | 1900        | 15        | 128        | 74  | 5  | 0.594 | 0.051 | 1.098 | 0.059 | 0.0134 | 0.0009 | 0.00153 | 0.00003 | 27 | 7  |
| <b>DLS110 13</b>  | 2.7        | 1367        | 12        | 118        | 161 | 24 | 0.227 | 0.061 | 0.195 | 0.044 | 0.0062 | 0.0009 | 0.00135 | 0.00004 | 31 | 6  |
| <b>DLS110 14</b>  | 2.7        | 1255        | 12        | 109        | 104 | 13 | 0.388 | 0.070 | 0.515 | 0.067 | 0.0097 | 0.0012 | 0.00147 | 0.00005 | 35 | 7  |
| <b>DLS110 15</b>  | 3.4        | 1630        | 10        | 161        | 84  | 8  | 0.491 | 0.066 | 0.803 | 0.076 | 0.0119 | 0.0012 | 0.00144 | 0.00003 | 33 | 8  |
| <b>DLS110 16</b>  | 2.7        | 1288        | 11        | 113        | 118 | 12 | 0.318 | 0.057 | 0.372 | 0.055 | 0.0085 | 0.0009 | 0.00143 | 0.00004 | 36 | 5  |
| <b>DLS110 17</b>  | 2.8        | 1291        | 11        | 114        | 82  | 10 | 0.494 | 0.078 | 0.825 | 0.090 | 0.0121 | 0.0014 | 0.00157 | 0.00005 | 34 | 9  |
| <b>mean</b>       | <b>3.4</b> | <b>1603</b> | <b>12</b> | <b>136</b> |     |    |       |       |       |       |        |        |         |         |    |    |
| <b>ZJLZ103 01</b> | 4.7        | 1985        | 6.3       | 313        | 47  | 3  | 0.725 | 0.055 | 2.108 | 0.092 | 0.0211 | 0.0014 | 0.00159 | 0.00003 | 19 | 11 |
| <b>ZJLZ103 02</b> | 3.6        | 1783        | 5.4       | 333        | 115 | 13 | 0.359 | 0.065 | 0.432 | 0.061 | 0.0087 | 0.0010 | 0.00146 | 0.00003 | 34 | 6  |
| <b>ZJLZ103 03</b> | 3.9        | 1852        | 5.1       | 367        | 53  | 3  | 0.695 | 0.051 | 1.820 | 0.078 | 0.0190 | 0.0012 | 0.00152 | 0.00003 | 22 | 10 |
| <b>ZJLZ103 04</b> | 2.9        | 1390        | 5.7       | 244        | 132 | 14 | 0.294 | 0.053 | 0.306 | 0.046 | 0.0076 | 0.0008 | 0.00149 | 0.00003 | 33 | 5  |
| <b>ZJLZ103 05</b> | 4.2        | 2053        | 7.2       | 286        | 106 | 9  | 0.381 | 0.047 | 0.494 | 0.047 | 0.0094 | 0.0008 | 0.00145 | 0.00002 | 35 | 5  |
| <b>ZJLZ103 06</b> | 4.3        | 1995        | 4.7       | 429        | 62  | 10 | 0.626 | 0.122 | 1.389 | 0.170 | 0.0161 | 0.0025 | 0.00145 | 0.00004 | 28 | 17 |
| <b>ZJLZ103 07</b> | 3.6        | 1795        | 7.1       | 255        | 124 | 22 | 0.321 | 0.088 | 0.356 | 0.076 | 0.0081 | 0.0014 | 0.00144 | 0.00004 | 34 | 8  |
| <b>ZJLZ103 08</b> | 4.6        | 2113        | 7.7       | 274        | 70  | 6  | 0.557 | 0.058 | 1.105 | 0.071 | 0.0144 | 0.0012 | 0.00149 | 0.00003 | 33 | 8  |
| <b>ZJLZ103 09</b> | 3.8        | 1972        | 6.1       | 322        | 111 | 16 | 0.368 | 0.074 | 0.456 | 0.066 | 0.0090 | 0.0013 | 0.00143 | 0.00003 | 34 | 7  |
| <b>ZJLZ103 10</b> | 3.5        | 1722        | 4.0       | 431        | 93  | 12 | 0.445 | 0.075 | 0.662 | 0.076 | 0.0108 | 0.0014 | 0.00139 | 0.00003 | 34 | 8  |
| <b>ZJLZ103 11</b> | 2.9        | 1399        | 6.4       | 219        | 111 | 12 | 0.365 | 0.054 | 0.451 | 0.049 | 0.0090 | 0.0009 | 0.00161 | 0.00003 | 34 | 6  |

|                   |            |             |            |            |     |    |       |       |       |       |        |        |         |         |    |    |
|-------------------|------------|-------------|------------|------------|-----|----|-------|-------|-------|-------|--------|--------|---------|---------|----|----|
| <b>ZJLZ103 12</b> | 3.1        | 1547        | 5.8        | 266        | 139 | 19 | 0.277 | 0.063 | 0.275 | 0.050 | 0.0072 | 0.0010 | 0.00143 | 0.00003 | 33 | 6  |
| <b>ZJLZ103 13</b> | 3.7        | 1651        | 6.6        | 250        | 52  | 3  | 0.681 | 0.042 | 1.798 | 0.067 | 0.0192 | 0.0010 | 0.00162 | 0.00003 | 24 | 9  |
| <b>ZJLZ103 14</b> | 2.8        | 1402        | 6.1        | 229        | 129 | 9  | 0.293 | 0.035 | 0.314 | 0.030 | 0.0078 | 0.0006 | 0.00140 | 0.00002 | 34 | 4  |
| <b>ZJLZ103 15</b> | 3.6        | 1611        | 15         | 109        | 127 | 9  | 0.314 | 0.032 | 0.340 | 0.025 | 0.0079 | 0.0006 | 0.00143 | 0.00003 | 33 | 3  |
| <b>ZJLZ103 16</b> | 7.4        | 3642        | 31         | 118        | 118 | 12 | 0.334 | 0.051 | 0.389 | 0.044 | 0.0085 | 0.0009 | 0.00148 | 0.00003 | 35 | 5  |
| <b>ZJLZ103 17</b> | 4.1        | 2120        | 7.6        | 279        | 130 | 15 | 0.296 | 0.051 | 0.314 | 0.041 | 0.0077 | 0.0009 | 0.00142 | 0.00003 | 34 | 5  |
| <b>ZJLZ103 18</b> | 3.1        | 1528        | 6.2        | 248        | 113 | 12 | 0.352 | 0.053 | 0.431 | 0.048 | 0.0089 | 0.0009 | 0.00149 | 0.00003 | 35 | 5  |
| <b>ZJLZ103 19</b> | 2.4        | 1143        | 5.7        | 202        | 140 | 19 | 0.264 | 0.064 | 0.259 | 0.053 | 0.0071 | 0.0010 | 0.00146 | 0.00003 | 33 | 6  |
| <b>mean</b>       | <b>3.8</b> | <b>1826</b> | <b>7.8</b> | <b>272</b> |     |    |       |       |       |       |        |        |         |         |    |    |
| <b>LZ122 01</b>   | 13         | 5041        | 29         | 171        | 108 | 6  | 0.409 | 0.049 | 0.523 | 0.057 | 0.0093 | 0.0005 | 0.00155 | 0.00003 | 32 | 4  |
| <b>LZ122 02</b>   | 13         | 5077        | 30         | 167        | 72  | 3  | 0.509 | 0.031 | 0.968 | 0.051 | 0.0138 | 0.0005 | 0.00158 | 0.00003 | 37 | 5  |
| <b>LZ122 03</b>   | 12         | 4980        | 26         | 190        | 118 | 7  | 0.413 | 0.046 | 0.482 | 0.048 | 0.0085 | 0.0005 | 0.00149 | 0.00003 | 29 | 4  |
| <b>LZ122 04</b>   | 12         | 4946        | 27         | 186        | 110 | 6  | 0.446 | 0.042 | 0.561 | 0.047 | 0.0091 | 0.0005 | 0.00151 | 0.00003 | 29 | 4  |
| <b>LZ122 05</b>   | 12         | 4934        | 28         | 176        | 98  | 4  | 0.397 | 0.036 | 0.559 | 0.046 | 0.0102 | 0.0005 | 0.00153 | 0.00003 | 36 | 4  |
| <b>LZ122 06</b>   | 12         | 4879        | 31         | 158        | 76  | 3  | 0.510 | 0.030 | 0.924 | 0.047 | 0.0132 | 0.0005 | 0.00153 | 0.00003 | 35 | 5  |
| <b>LZ122 07</b>   | 12         | 4755        | 29         | 163        | 90  | 4  | 0.466 | 0.036 | 0.709 | 0.048 | 0.0111 | 0.0005 | 0.00150 | 0.00003 | 33 | 4  |
| <b>LZ122 08</b>   | 12         | 4939        | 31         | 160        | 89  | 3  | 0.456 | 0.029 | 0.704 | 0.039 | 0.0112 | 0.0004 | 0.00149 | 0.00003 | 35 | 4  |
| <b>LZ122 09</b>   | 13         | 4659        | 28         | 164        | 65  | 3  | 0.581 | 0.043 | 1.234 | 0.074 | 0.0154 | 0.0007 | 0.00159 | 0.00003 | 32 | 7  |
| <b>LZ122 10</b>   | 10         | 4168        | 25         | 164        | 109 | 7  | 0.376 | 0.054 | 0.476 | 0.063 | 0.0092 | 0.0006 | 0.00152 | 0.00003 | 34 | 5  |
| <b>LZ122 11</b>   | 12         | 4161        | 23         | 182        | 123 | 9  | 0.311 | 0.060 | 0.349 | 0.062 | 0.0082 | 0.0006 | 0.00143 | 0.00003 | 35 | 5  |
| <b>LZ122 12</b>   | 11         | 4182        | 23         | 186        | 88  | 5  | 0.502 | 0.050 | 0.784 | 0.066 | 0.0113 | 0.0007 | 0.00156 | 0.00003 | 31 | 6  |
| <b>LZ122 13</b>   | 10         | 4211        | 23         | 182        | 103 | 5  | 0.439 | 0.042 | 0.586 | 0.048 | 0.0097 | 0.0005 | 0.00149 | 0.00003 | 31 | 4  |
| <b>LZ122 14</b>   | 12         | 4441        | 29         | 153        | 93  | 4  | 0.435 | 0.036 | 0.640 | 0.047 | 0.0107 | 0.0005 | 0.00151 | 0.00003 | 35 | 4  |
| <b>LZ122 15</b>   | 10         | 3926        | 26         | 149        | 106 | 5  | 0.413 | 0.036 | 0.537 | 0.042 | 0.0095 | 0.0004 | 0.00153 | 0.00003 | 33 | 4  |
| <b>LZ122 16</b>   | 12         | 4290        | 28         | 153        | 57  | 2  | 0.630 | 0.031 | 1.515 | 0.063 | 0.0175 | 0.0006 | 0.00166 | 0.00003 | 30 | 7  |
| <b>LZ122 17</b>   | 12         | 4226        | 28         | 153        | 60  | 2  | 0.637 | 0.033 | 1.462 | 0.063 | 0.0167 | 0.0006 | 0.00169 | 0.00003 | 27 | 7  |
| <b>LZ122 18</b>   | 11         | 4178        | 27         | 155        | 59  | 2  | 0.552 | 0.028 | 1.277 | 0.056 | 0.0168 | 0.0005 | 0.00164 | 0.00003 | 39 | 6  |
| <b>mean</b>       | <b>12</b>  | <b>4555</b> | <b>27</b>  | <b>167</b> |     |    |       |       |       |       |        |        |         |         |    |    |
| <b>DLC43 01</b>   | 0.34       | 378         | 3.1        | 120        | 236 | 69 | 0.346 | 0.160 | 0.201 | 0.072 | 0.0042 | 0.0012 | 0.00061 | 0.00004 | 17 | 7  |
| <b>DLC43 02</b>   | 0.41       | 351         | 2.5        | 141        | 70  | 7  | 0.639 | 0.085 | 1.250 | 0.109 | 0.0142 | 0.0015 | 0.00083 | 0.00003 | 23 | 11 |
| <b>DLC43 03</b>   | 0.42       | 401         | 2.4        | 170        | 78  | 9  | 0.618 | 0.096 | 1.095 | 0.109 | 0.0129 | 0.0016 | 0.00074 | 0.00003 | 23 | 11 |
| <b>DLC43 04</b>   | 2.37       | 450         | 2.7        | 166        | 53  | 4  | 0.718 | 0.069 | 1.881 | 0.114 | 0.0190 | 0.0015 | 0.00085 | 0.00003 | 18 | 12 |

|                 |             |            |            |            |     |    |       |       |       |       |        |        |         |         |    |    |
|-----------------|-------------|------------|------------|------------|-----|----|-------|-------|-------|-------|--------|--------|---------|---------|----|----|
| <b>DLC43 05</b> | 0.54        | 465        | 3.0        | 154        | 86  | 11 | 0.602 | 0.095 | 0.965 | 0.094 | 0.0117 | 0.0015 | 0.00087 | 0.00003 | 22 | 10 |
| <b>DLC43 06</b> | 0.53        | 507        | 3.2        | 158        | 111 | 14 | 0.543 | 0.089 | 0.671 | 0.071 | 0.0090 | 0.0012 | 0.00074 | 0.00002 | 21 | 7  |
| <b>DLC43 07</b> | 0.58        | 577        | 3.1        | 185        | 107 | 19 | 0.559 | 0.124 | 0.722 | 0.098 | 0.0094 | 0.0017 | 0.00069 | 0.00003 | 21 | 10 |
| <b>DLC43 08</b> | 0.68        | 678        | 3.4        | 202        | 187 | 32 | 0.200 | 0.097 | 0.147 | 0.067 | 0.0054 | 0.0009 | 0.00071 | 0.00002 | 28 | 6  |
| <b>DLC43 09</b> | 0.53        | 504        | 3.3        | 153        | 173 | 34 | 0.434 | 0.119 | 0.345 | 0.066 | 0.0058 | 0.0011 | 0.00071 | 0.00003 | 19 | 7  |
| <b>DLC43 10</b> | 0.43        | 456        | 3.3        | 139        | 192 | 60 | 0.406 | 0.174 | 0.292 | 0.086 | 0.0052 | 0.0016 | 0.00065 | 0.00004 | 18 | 9  |
| <b>DLC43 11</b> | 0.71        | 543        | 3.0        | 180        | 50  | 4  | 0.711 | 0.066 | 1.965 | 0.105 | 0.0201 | 0.0016 | 0.00091 | 0.00003 | 21 | 13 |
| <b>DLC43 12</b> | 0.41        | 393        | 3.1        | 128        | 232 | 63 | 0.351 | 0.149 | 0.209 | 0.068 | 0.0043 | 0.0012 | 0.00063 | 0.00003 | 17 | 7  |
| <b>mean</b>     | <b>0.66</b> | <b>475</b> | <b>3.0</b> | <b>158</b> |     |    |       |       |       |       |        |        |         |         |    |    |

---
